# Supplementary material for: Kinetic and computational evidence for an intermediate in the hydrolysis of sulfonate esters
Source: Royal Society of Chemistry journal article supplement (doi:10.1039/c2ob25699a), 2012-01-01
Supplement: c2ob25699a.pdf [file c2ob25699a.pdf]

Electronic Supplementary Information for

**Kinetic and computational evidence for an  
intermediate in the hydrolysis of sulfonate esters**

Ann C. Babbie,<sup>1</sup> Marcelo F. Lima,<sup>1,2,3</sup> Anthony J. Kirby<sup>2\*</sup> & Florian Hollfelder<sup>1\*</sup>

<sup>1</sup>Department of Biochemistry, University of Cambridge, 80 Tennis Court Road, Cambridge CB2 1GA.

<sup>2</sup>Department of Chemistry, University of Cambridge, Lensfield Road, Cambridge CB2 1EW, UK

<sup>3</sup> Present address: LQBOA – Campus Universitário do Araguaia, Universidade Federal de Mato Grosso, Barra do Garças-MT, ZIP code 78600-000 – Brazil

\*Correspondence: E-mail: [ajk1@cam.ac.uk](mailto:ajk1@cam.ac.uk), [fh111@mole.bio.cam.ac.uk](mailto:fh111@mole.bio.cam.ac.uk); Fax: (+)44-1223-766002.

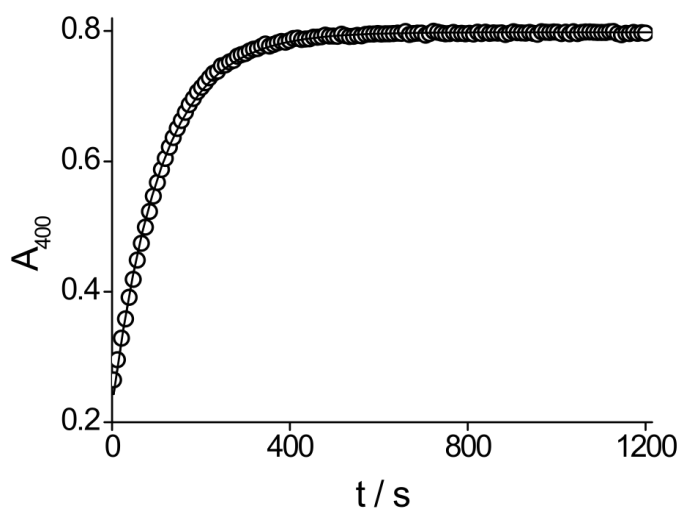

**Figure S1.** *Kinetics of the reaction of 4-nitrophenyl benzenesulfonate 1.* (A) A typical progress curve ( $[4\text{-nitrophenyl benzenesulfonate}] = 0.04 \text{ mM}$ ,  $T = 50^\circ\text{C}$ ,  $0.1 \text{ M KOH}$ ). Pseudo-first order rate constants  $k_{\text{obs}}$  were obtained from exponential fits of progress curves (using  $A_t = A_\infty - (A_\infty - A_0)e^{-k_{\text{obs}}t}$ )

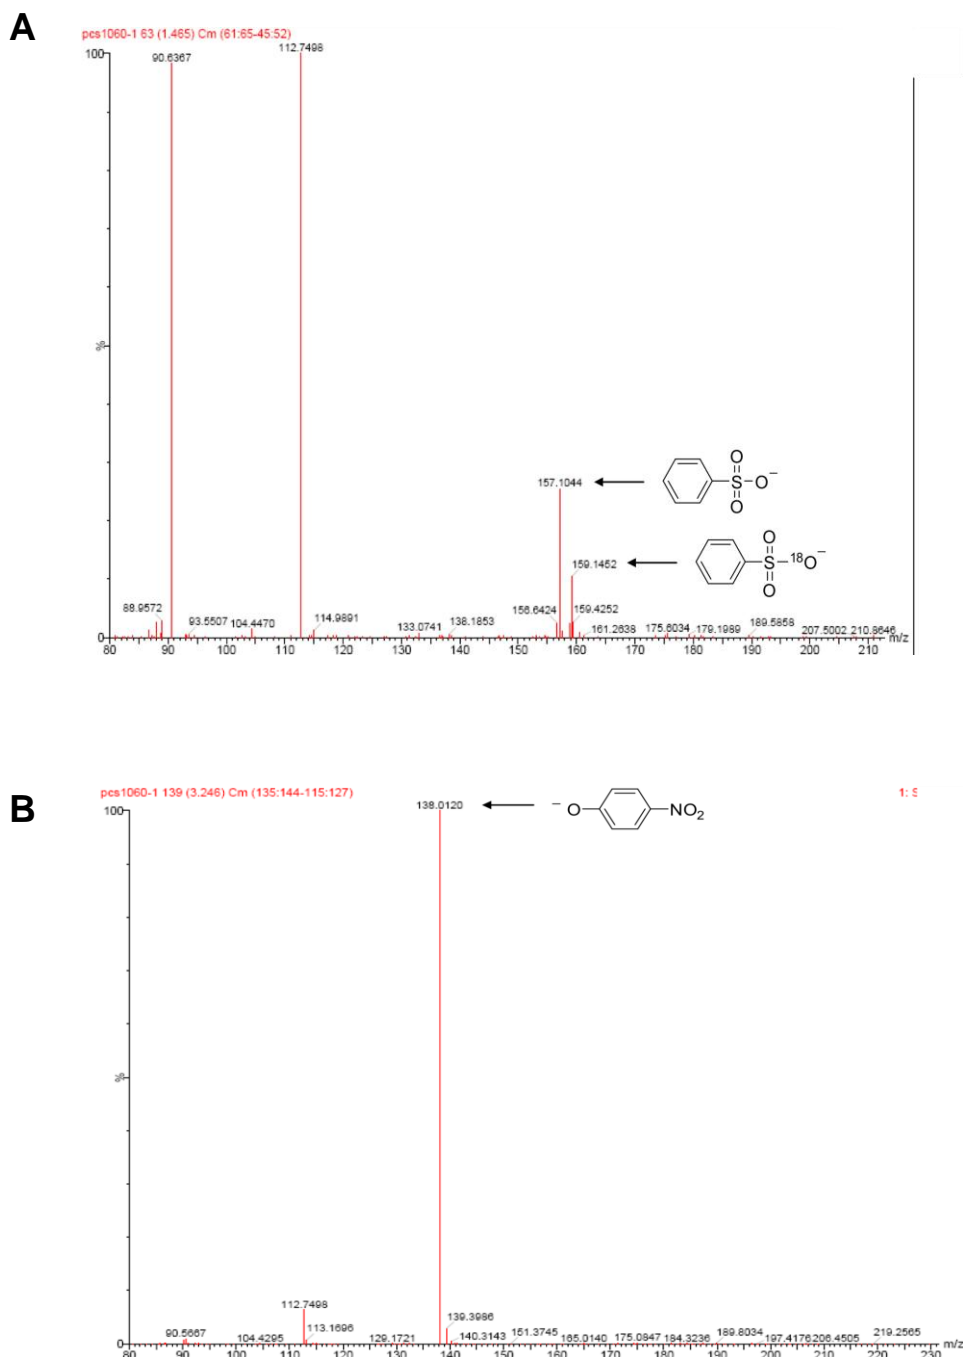

**Figure S2:** LC-MS of products of 4-nitrophenyl benzene sulfonate hydrolysis in the presence of 38 %  $\text{H}_2^{18}\text{O}$ .  $^{18}\text{O}$  was only detected in the  $\text{PhSO}_3^-$  product (A); the  $(\text{O}_2\text{N})\text{C}_6\text{H}_4\text{O}^-$  product was unlabelled (B).

**A**

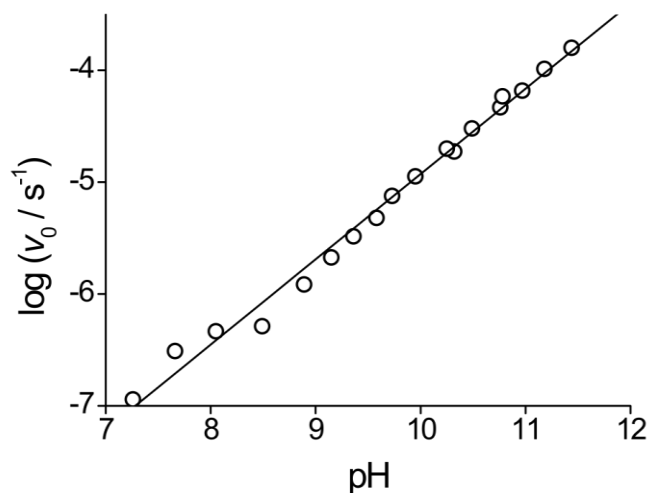

**B**

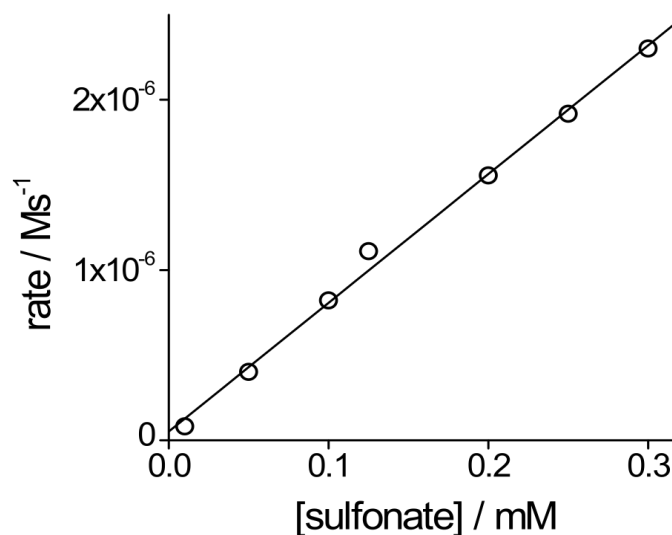

**Figure S3.** Kinetic plots for the hydrolysis of 4-nitrophenyl benzenesulfonate **1**. **(A)** The pH-rate profile of the hydrolysis of **1** is linear ( $r = 0.99$ ), establishing first order kinetics with respect to the hydroxide nucleophile. *Conditions:* 0.01-0.12 M KOH;  $T = 50^\circ\text{C}$ ; 0.25 mM sulfonate **(B)** The initial rate correlates linearly to sulfonate ester concentration. *Conditions:* 0.1 M KOH;  $T = 50^\circ\text{C}$ ; 0.01-0.3 mM sulfonate.

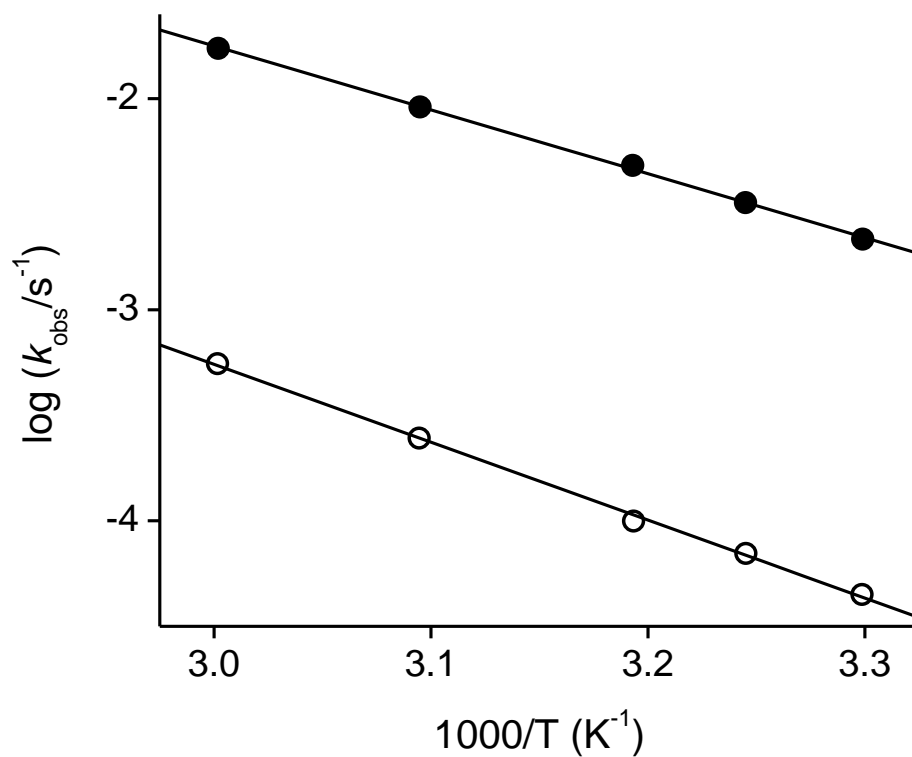

**Figure S4:** Arrhenius plots for the alkaline hydrolysis of phenyl- and *p*-nitrophenyl benzenesulfonates. Phenyl benzenesulfonate (open circles; gradient =  $-3.7 \pm 0.1$ , y-intercept =  $7.8 \pm 0.3$ ), 4-nitrophenyl benzenesulfonate (filled circles; gradient =  $-3.0 \pm 0.1$ , y-intercept =  $7.3 \pm 0.2$ ). *Conditions:* 0.1 M KOH; T = 30–60 °C.

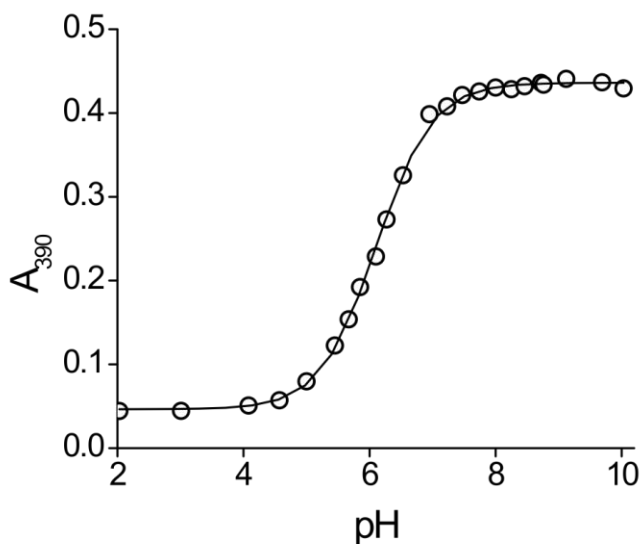

**Figure S5:** Determining  $pK_a$  of 3-fluoro-4-nitrophenol. *Conditions:* 100 mM buffers (pH adjusted with HCl or KOH): CHES (pH 9-10), Tris (pH 7-9), MES (pH 5.5-6.5), acetic acid (pH 4-5), phosphoric acid (pH 2-3); [3-fluoro-4-nitrophenol] = 30  $\mu$ M;  $T = 25$  °C; 200  $\mu$ l total volume in 96-well plates (Nunc). A  $pK_a$  value of  $6.11 \pm 0.01$  was determined by fitting to the following equation:  $A_{390} = A_2 + (A_1 - A_2)/(1 + \exp((\text{pH} - pK_a)/dx))$  where  $A_1$  and  $A_2$  are the lower and upper bounds of  $A_{390}$  respectively and  $dx$  is the slope factor.

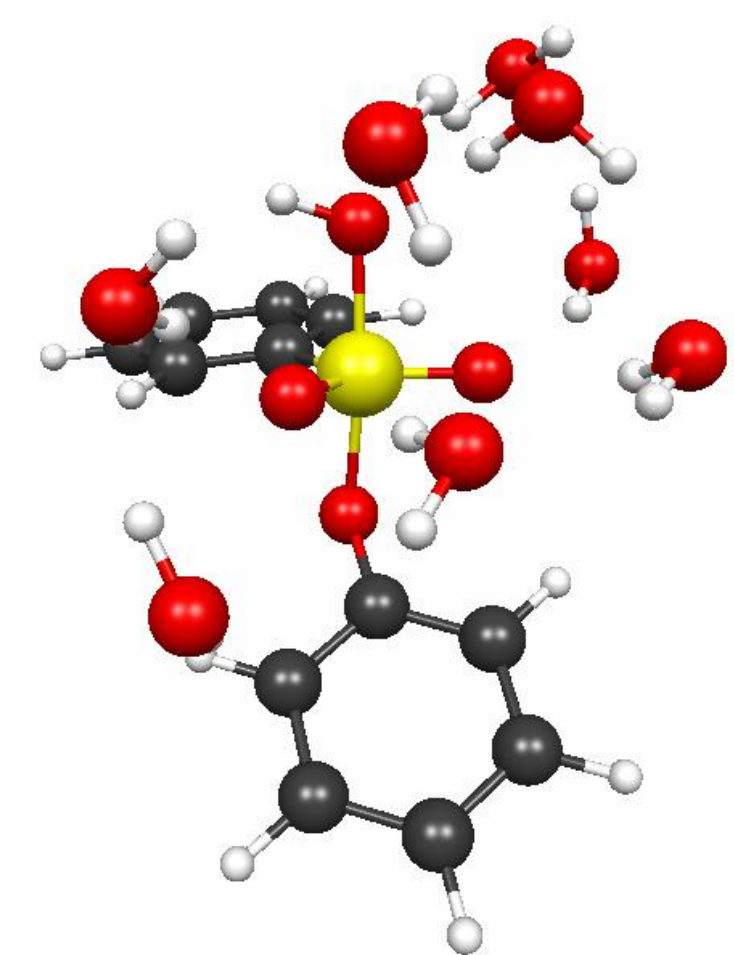

**Figure S6.** Coloured ball and stick model of the calculated structure shown in Figure 2.

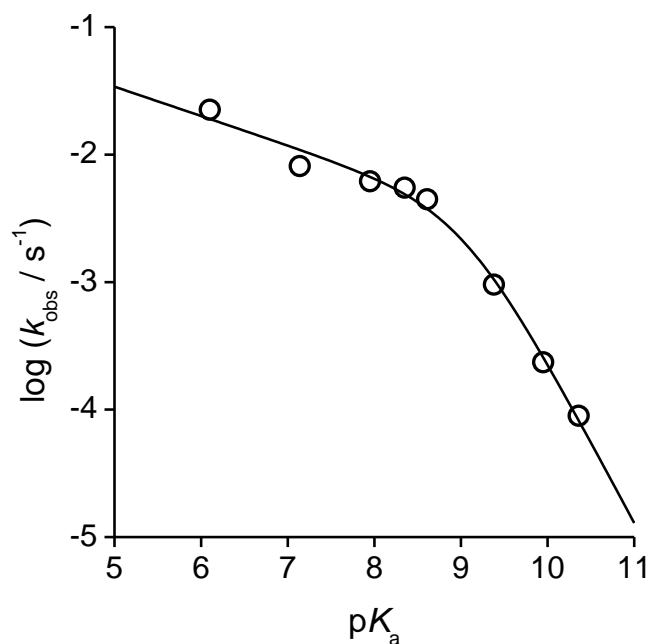

**Figure S7:** A fit of the data shown in Figure 1 of the main text to a composite of two curves with different slopes (corresponding to a shifting TS structure in an alternative concerted mechanism). Fitting to the equation  $\log k_{\text{obs}} = A_1 + (\beta_{\text{LG}}^{\text{left}} * pK_a) - \log(1 + 10^{((\beta_{\text{LG}}^{\text{left}} - \beta_{\text{LG}}^{\text{right}}) * (pK_a - A_2)))}$ , yielded the following parameters:  $\beta_{\text{LG}}^{\text{left}} = -0.23 \pm 0.07$ ;  $\beta_{\text{LG}}^{\text{right}} = -1.3 \pm 0.2$ ;  $A_1 = -0.3 \pm 0.5$  (intercept at pK<sub>a</sub> zero);  $A_2 = 9.1 \pm 0.3$  (breakpoint).

**Table S1.** Parameters for the substituted phenyl benzenesulfonates tested in this work. The substituent on the leaving group phenol (X in Scheme 1) is used to identify the sulfonate. The leaving group  $pK_a$  values (at  $T = 25\text{ }^{\circ}\text{C}$ ) and mean  $\log(k_{\text{obs}})$  values used in Figure 1 are listed. The wavelengths used to follow accumulation of the hydrolysis product of each sulfonate ester are given. *Conditions:* 0.1 M KOH;  $T = 50\text{ }^{\circ}\text{C}$ .

| X                     | $pK_a$ | $\lambda / \text{nm}$ | $\log(k_{\text{obs}}/\text{s}^{-1})$ |
|-----------------------|--------|-----------------------|--------------------------------------|
| 3-F-4-NO <sub>2</sub> | 6.11   | 440                   | -1.65                                |
| 4-NO <sub>2</sub>     | 7.14   | 440                   | -2.09                                |
| 4-CN                  | 7.95   | 276                   | -2.21                                |
| 3-NO <sub>2</sub>     | 8.35   | 395                   | -2.26                                |
| 3-CN                  | 8.61   | 291                   | -2.35                                |
| 4-Cl                  | 9.38   | 299                   | -3.02                                |
| H                     | 9.95   | 280                   | -3.63                                |
| 3,4-diMe              | 10.36  | 237                   | -4.05                                |

**Table S2.** Cartesian coordinates of the calculated intermediate structure shown in Figures 2 and S6.

|   |         |         |         |
|---|---------|---------|---------|
| S | -0.1409 | -0.1782 | -0.4444 |
| O | -0.2728 | -0.2127 | 1.0083  |
| O | 1.1345  | -0.0858 | -1.1428 |
| C | -1.6346 | -0.3664 | -1.4112 |
| O | -0.1387 | -2.0286 | -0.5507 |
| O | -0.3653 | 1.5550  | -0.5442 |
| C | -1.5723 | -0.2537 | -2.7881 |
| C | -2.7453 | -0.3594 | -3.5224 |
| C | -3.9576 | -0.5715 | -2.8797 |
| C | -3.9985 | -0.6815 | -1.4965 |
| C | -2.8300 | -0.5885 | -0.7526 |
| H | -0.6354 | -0.0823 | -3.2827 |
| H | -2.7086 | -0.2758 | -4.5937 |
| H | -4.8639 | -0.6493 | -3.4529 |
| H | -4.9343 | -0.8506 | -0.9948 |
| H | -2.8548 | -0.6945 | 0.3158  |
| C | 0.5915  | -2.7787 | 0.2880  |
| H | -1.1315 | 1.8131  | -0.0410 |
| C | -0.0500 | -3.5186 | 1.2845  |
| C | 0.6751  | -4.3524 | 2.1235  |
| C | 2.0568  | -4.4545 | 1.9961  |
| C | 2.6959  | -3.7222 | 1.0052  |
| C | 1.9744  | -2.8944 | 0.1542  |
| H | -1.1175 | -3.4359 | 1.3837  |
| H | 0.1608  | -4.9292 | 2.8739  |
| H | 2.6191  | -5.0980 | 2.6492  |
| H | 3.7635  | -3.7957 | 0.8882  |
| H | 2.4741  | -2.3335 | -0.6127 |
| O | 1.2867  | 2.5088  | 3.5220  |
| H | 1.8131  | 1.7356  | 3.3958  |
| H | 1.2824  | 2.9713  | 2.6992  |
| O | 1.7024  | 3.2063  | 0.7039  |
| H | 2.5163  | 2.7463  | 0.5742  |
| H | 1.0327  | 2.6992  | 0.2735  |

|   |         |         |         |
|---|---------|---------|---------|
| O | -0.9348 | 0.5444  | 3.8009  |
| H | -0.3686 | 1.2966  | 3.8676  |
| H | -0.9906 | 0.3274  | 2.8840  |
| O | 3.5832  | 0.9668  | 0.2338  |
| H | 3.5127  | 0.5763  | 1.0902  |
| H | 2.9128  | 0.5717  | -0.3004 |
| O | 2.2695  | -0.0523 | 2.6437  |
| H | 2.2559  | -0.7111 | 3.3195  |
| H | 1.4992  | -0.1891 | 2.1158  |
| O | 0.3102  | 3.0681  | -2.9558 |
| H | 0.7113  | 3.8753  | -2.6757 |
| H | 0.0363  | 2.6157  | -2.1740 |
| O | 2.0771  | 0.9015  | -3.8127 |
| H | 1.5886  | 1.7075  | -3.7616 |
| H | 1.9177  | 0.4362  | -3.0071 |
| O | 0.7503  | -1.7799 | 4.5125  |
| H | 0.1182  | -1.0828 | 4.4393  |
| H | 0.4887  | -2.4487 | 3.8999  |
